# Supplementary material for: Outcomes after microsurgical treatment of lymphedema: a systematic review and meta-analysis
Source: PubMed Central journal article supplement (PMC10389392; doi:10.1097/js9.0000000000000210), 2023-04-17
Supplement: js9-109-1360-s003.pdf [file js9-109-1360-s003.pdf]

| Author                                | Year | Title                                                                                                                                                                                          | Reason for exclusion                                                                  |
|---------------------------------------|------|------------------------------------------------------------------------------------------------------------------------------------------------------------------------------------------------|---------------------------------------------------------------------------------------|
| Bolletta, A                           | 2022 | Combined lymph node transfer and suction-assisted lipectomy in lymphedema treatment: A prospective study                                                                                       | Results reported only for combination of GEVLTN and liposuction                       |
| Scaglioni, MF                         | 2022 | Combining superficial and deep lymphovenous anastomosis for lymphedema treatment: Preliminary results                                                                                          | No outcomes data reported                                                             |
| Bamba, R                              | 2021 | Outcomes analysis of microsurgical physiologic lymphatic procedures for the upper extremity from the United States National Surgical Quality Improvement Program                               | No outcomes data reported                                                             |
| Bianchi, A                            | 2021 | Recipient Venule Selection and Anastomosis Configuration for Lymphaticovenular Anastomosis in Extremity Lymphedema: Algorithm Based on 1,000 Lymphaticovenular Anastomosis                     | No outcomes data reported                                                             |
| Chamberlain, K et al.                 | 2021 | Quality of Life Outcomes Based on Recipient Site Choice in Vascularized Lymph Node Transfer for Treatment of Breast Cancer-Related Lymphedema                                                  | Systematic review and protocol for further study                                      |
| Chang, D. W.                          | 2021 | Combined Approach to Surgical Treatment of Lymphedema                                                                                                                                          | No outcomes data reported                                                             |
| Ciudad, P. et al.                     | 2021 | A single-stage triple-inset vascularized gastroepiploic lymph node transfers for the surgical treatment of extremity lymphedema                                                                | Letter to the editor                                                                  |
| Ciudad, P. et al.                     | 2021 | Preoperative indocyanine green lymphographic planning for dorsal metatarsal vascularized lymph vessel transfer in the treatment of upper extremity lymphedema                                  | Letter to the editor                                                                  |
| Pons, G. et al.                       | 2021 | Reverse Lymph Node Mapping Using Indocyanine Green Lymphography: A Step Forward in Minimizing Donor-Site Morbidity in Vascularized Lymph Node Transfer                                         | No outcomes data reported                                                             |
| Sakai, H.                             | 2021 | Evidence of lymph flow amelioration on indocyanine green lymphography after vascularized lymph node transfer                                                                                   | Letter to the editor                                                                  |
| Campisi C                             | 2021 | Matching primary with secondary lymphedemas across lymphatic surgery in genoa (italy) from 1973 until time of covid-19                                                                         | Incomplete outcomes data prevented inclusion                                          |
| Cheng, M. H. and Tee, I               | 2020 | Simultaneous Ipsilateral Vascularized Lymph Node Transplantation and Contralateral Lymphovenous Anastomosis in Bilateral Extremity Lymphedema with Different Severities                        | Included pediatric patients                                                           |
| Ciudad, P. and Forte, A               | 2020 | Impact of body mass index on long-term surgical outcomes of vascularized lymph node transfer in lymphedema patients                                                                            | Same set of patients than a more recent study of the same author                      |
| Koide, S. and Lin, C. Y. z            | 2020 | Delayed primary retention suture for inset of vascularized submental lymph node flap for lower extremity lymphedema                                                                            | No outcomes data reported; same set of patients than another study of the same author |
| Pereira, N. and Cambar                | 2020 | Prevention and Treatment of Posttraumatic Lymphedema by Soft Tissue Reconstruction With Lymphatic Vessels Free Flap: An Observational Study                                                    | Other surgical technique                                                              |
| Chen, W. F. and Knacks van Mulken TJM | 2020 | Delayed Distally Based Prophylactic Lymphaticovenular Anastomosis: Improved Functionality, Feasibility, and Oncologic Safety?                                                                  | Letter to the editor                                                                  |
| Suzuki, Y. and Sakuma,                | 2019 | First-in-human robotic supermicrosurgery using a dedicated microsurgical robot for treating breast cancer-related lymphedema: a randomized pilot trial                                         | Same set of patients than a more recent study of the same author                      |
| Yoshida, S. and Koshim                | 2019 | Evaluation of patency rates of different lymphaticovenous anastomosis techniques and risk factors for obstruction in secondary upper extremity lymphedema                                      | Insufficient/missing population characteristics                                       |
| Kraft, C. T. and Eiferma              | 2019 | Line production system for multiple lymphaticovenular anastomoses                                                                                                                              | Insufficient/missing population characteristics                                       |
| Brebant, V. and Heine,                | 2019 | Complications after vascularized jejunal mesenteric lymph node transfer: A 3-year experience                                                                                                   | No outcomes data reported                                                             |
| Yoshida, S. and Koshim                | 2019 | Augmented reality of indocyanine green fluorescence in simplified lymphovenous anastomosis in lymphatic surgery                                                                                | Insufficient/missing population characteristics                                       |
| Koshima, I. and Yoshida               | 2019 | Mechanical Dilatation Using Nylon Monofilament Aids Multisite Lymphaticovenous Anastomosis Through Improving the Quality of Anastomosis                                                        | Insufficient/missing population characteristics                                       |
| Atta, A. T.                           | 2019 | Effect of pregnancy on lower limb lymphedema in patients treated with multisite lymphaticovenular anastomoses (MLVAS)                                                                          | No outcomes data reported                                                             |
| Campisi, C.                           | 2019 | Mri and clinical evaluation of free lymph node transfer in management of lymphoedema of extremities                                                                                            | Congress report                                                                       |
| Cheng, M. H. and Loh, I               | 2018 | Single-site multiple lymphatic venous anastomosis (SS-MLVA) for the staging-guided peripheral lymphedematreatment and consistent long-term clinical outcomes                                   | Congress report                                                                       |
| Cheng MH                              | 2018 | Outcomes of Vascularized Lymph Node Transfer and Lymphovenous Anastomosis for Treatment of Primary Lymphedema                                                                                  | Insufficient/missing population characteristics                                       |
| Akita, S. and Ogata, F. z             | 2017 | Validity of the Novel Taiwan Lymphoscintigraphy Staging and Correlation of Cheng Lymphedema Grading for Unilateral Extremity Lymphedema                                                        | Insufficient/missing population characteristics                                       |
| Batista, B. N. and Germ               | 2017 | Noninvasive screening test for detecting early stage lymphedema using follow-up computed tomography imaging after cancer treatment and results of treatment with lymphaticovenular anastomosis | Insufficient/missing population characteristics                                       |
| Cheng, M. H. and Lin, C               | 2017 | Lymph node flap transfer for patients with secondary lower limb lymphedema                                                                                                                     | Included pediatric patients                                                           |
| Chiewwit, S. and Kumne                | 2017 | A prospective clinical assessment of anatomic variability of the submental vascularized lymph node flap                                                                                        | No outcomes data reported                                                             |
| Lee, K. T. and Park, J. V             | 2017 | Lymphoscintigraphic Findings That Predict Favorable Outcome after Lymphaticovenous Anastomosis                                                                                                 | Included pediatric patients                                                           |
| Maldonado, A. A. and C                | 2017 | Serial two-year follow-up after lymphaticovenular anastomosis for the treatment of lymphedema                                                                                                  | Included pediatric patients                                                           |
| Maegawa, J. and Matsi                 | 2017 | The use of supraclavicular free flap with vascularized lymph node transfer for treatment of lymphedema: A prospective study of 100 consecutive cases                                           | No outcomes data reported                                                             |
| Noda, Y. and limura, T.               | 2017 | Mid- and long-term results of patency in side-to-end lymphatic venous anastomosis for treatment of upper limb lymphedema                                                                       | Document could not be retrieved                                                       |
| Ciudad P                              | 2017 | Analysis of the outcome of lymphovenous anastomosis using lymphoscintigraphy and spect-ct-new classification of lower-limb lymphedema                                                          | Document could not be retrieved                                                       |
| Koshima, I. and Narush                | 2016 | Comparison of long-term clinical outcomes among different vascularized lymph node transfers: 6-year experience of a single center's approach to the treatment of lymphedema                    | Same set of patients than a more recent study of the same author                      |
| Masia, J. and Pons, G. z              | 2016 | Lymphadiposal Flaps and Lymphaticovenular Anastomoses for Severe Leg Edema: Functional Reconstruction for Lymph Drainage System                                                                | Other surgical technique                                                              |
| Yamamoto, T. and Yosf                 | 2016 | Barcelona Lymphedema Algorithm for Surgical Treatment in Breast Cancer-Related Lymphedema                                                                                                      | Same set of patients than a more recent study of the same author                      |
| Campisi C                             | 2016 | Complete lymph flow reconstruction: A free vascularized lymph node true perforator flap transfer with efferent lymphaticolymphatic anastomosis                                                 | Case report                                                                           |
| Hara, H. and Mihara, M                | 2015 | A Single-Site Technique of Multiple Lymphatic-Venous Anastomoses for the Treatment of Peripheral Lymphedema: Long-Term Clinical Outcome                                                        | Insufficient/missing population characteristics                                       |
| Travis, E. C. and Shugg,              | 2015 | Indication of Lymphaticovenous Anastomosis for Lower Limb Primary Lymphedema                                                                                                                   | Included pediatric patients                                                           |
| Akita, S. and Mitsukaw.               | 2014 | Lymph node grafting in the treatment of upper limb lymphoedema: a clinical trial                                                                                                               | Other surgical technique                                                              |
| Boccardo F                            | 2013 | Suitable therapy options for sub-clinical and early-stage lymphoedema patients                                                                                                                 | Insufficient/missing population characteristics                                       |
| Oliszewski WL                         | 2013 | Lymphatic microsurgery to treat lymphedema: techniques and indications for better results                                                                                                      | Insufficient/missing population characteristics                                       |
| Felmerer, G. and Sattle               | 2012 | Lymphovenous microsurgical shunts in treatment of lymphedema of lower limbs: a 45-year experience of one surgeon/one center                                                                    | Unclear reporting of data                                                             |
| Campisi C                             | 2010 | Treatment of various secondary lymphedemas by microsurgical lymph vessel transplantation                                                                                                       | Other surgical technique                                                              |
| Becker, C. and Pham, D                | 2008 | Microsurgery for lymphedema: clinical research and long-term results                                                                                                                           | Insufficient/missing population characteristics                                       |
| Campisi C                             | 2007 | Postmastectomy neuropathic pain: results of microsurgical lymph nodes transplantation                                                                                                          | No outcomes data reported                                                             |
| Campisi C                             | 2006 | Microsurgery for treatment of peripheral lymphedema: long-term outcome and future perspectives                                                                                                 | Insufficient/missing population characteristics                                       |
| Campisi C                             | 2004 | Lymphatic microsurgery for the treatment of lymphedema                                                                                                                                         | Insufficient/missing population characteristics                                       |
| Campisi C                             | 2003 | Microsurgical techniques for lymphedema treatment: derivative lymphatic-venous microsurgery                                                                                                    | Insufficient/missing population characteristics                                       |
| Campisi C                             | 2003 | Peripheral lymphedema: new advances in microsurgical treatment and long-term outcome                                                                                                           | Insufficient/missing population characteristics                                       |
| Campisi C                             | 2003 | Current use of microsurgery in lymphedema                                                                                                                                                      | Insufficient/missing population characteristics                                       |
| Campisi, C. and Boccari               | 2001 | The use of vein grafts in the treatment of peripheral lymphedemas: long-term results                                                                                                           | Other surgical technique                                                              |
| Campisi C                             | 2001 | Long-term results after lymphatic-venous anastomoses for the treatment of obstructive lymphedema                                                                                               | Insufficient/missing population characteristics                                       |
| Campisi, C. and Boccari               | 1999 | Role of microsurgery in the management of lymphoedema                                                                                                                                          | Document could not be retrieved                                                       |
| Campisi, C. and Boccari               | 1999 | Microsurgical treatment of peripheral lymphedema: An overview upon 25 years clinical experience                                                                                                | Document could not be retrieved                                                       |
| Campisi C.                            | 1995 | Reconstructive microsurgery of lymph vessels: The personal method of lymphatic-venous-lymphatic (LVL) interpositioned grafted shunt                                                            | Other surgical technique                                                              |
| Egorov, Y. S. and Abalr               | 1994 | Autotransplantation of the greater omentum in the treatment of chronic lymphedema                                                                                                              | Included pediatric patients                                                           |
| Haddad, M. and Matz,                  | 1988 | Surgical treatment of limb lymphedema                                                                                                                                                          | Document could not be retrieved                                                       |
| Ipsen, T. and Pless, J. ai            | 1988 | Experience with microlymphaticovenous anastomoses for congenital and acquired lymphoedema                                                                                                      | Document could not be retrieved                                                       |
| Huang GK et al                        | 1985 | Surgical treatment of limb lymphedema                                                                                                                                                          | Document could not be retrieved                                                       |
| Krylov, V. S. and Milan               | 1985 | Microlymphaticovenous anastomosis in the treatment of lower limb obstructive lymphedema: analysis of 91 cases                                                                                  | Included filariasis patients                                                          |
| Degni, M.                             | 1984 | Reconstructive microsurgery in treatment of lymphoedema in extremities                                                                                                                         | Document could not be retrieved                                                       |
| Krylov, V. and Milanov,               | 1982 | Surgical management of selected patients with lymphedema of the extremities                                                                                                                    | Document could not be retrieved                                                       |
| Huang GK et al                        | 1981 | Microlymphatic surgery of secondary lymphoedema of the upper limb                                                                                                                              | Document could not be retrieved                                                       |
| Fox, U. and Montorsi, N               | 1981 | Microlymphaticovenous anastomosis for treating lymphedema of the extremities and external genitalia                                                                                            | Included filariasis patients                                                          |
| Fox, U. and Montorsi, N               | 1980 | Microsurgical treatment of lymphedemas of the limbs                                                                                                                                            | Document could not be retrieved                                                       |
| Degni, M.                             | 1974 | Surgical treatment of lymphedema of the limbs with lymphaticovenous anastomosis                                                                                                                | Document could not be retrieved                                                       |
|                                       |      | New technique of lymphatic venous anastomosis for the treatment of lymphedema                                                                                                                  | Document could not be retrieved                                                       |
