# Supplementary material for: Outcomes after microsurgical treatment of lymphedema: a systematic review and meta-analysis
Source: PubMed Central journal article supplement (PMC10389392; doi:10.1097/js9.0000000000000210), 2023-04-17
Supplement: js9-109-1360-s004.pdf [file js9-109-1360-s004.pdf]

| Authors                    | Study type                  | Nb patients | Etiology primary | Etiology secondary | Lower extremity | Upper extremity | Staging                             | Duration sympt (Mo) | Intervention        | Donor site VLNT                                        | Follow-up (Mo) | NOS score or Cochrane risk of bias |
|----------------------------|-----------------------------|-------------|------------------|--------------------|-----------------|-----------------|-------------------------------------|---------------------|---------------------|--------------------------------------------------------|----------------|------------------------------------|
| Moon et al, 2022           | Retrospective cohort        | 71          | 0%               | 95%                | 48%             | 52%             | ISL stage II-III                    | 90,0                | VLNT                | lateral thoracic/inguinal                              | 18,1           | 5/5                                |
| Van Mulken et al, 2022     | Randomized controlled trial | 20          | 0%               | 100%               | 0%              | 100%            | Not specified                       | NR                  | sLVA                | NA                                                     | 12,0           | High risk                          |
| Yang et al, 2022           | Prospective cohort          | 141         | 0%               | 78%                | 100%            | 0%              | ISL stage 0-III                     | 44,4                | sLVA                | NA                                                     | 26,2           | 5/5                                |
| Yasunaga et al, 2022       | Retrospective cohort        | 46          | 0%               | 100%               | 100%            | 0%              | ISL stage II                        | NR                  | sLVA                | NA                                                     | 6,0            | 4/5                                |
| Schiltz et al, 2022        | Retrospective cohort        | 42          | NR               | NR                 | 100%            | 0%              | Yamamoto stages not reported        | 72,0                | sLVA                | NA                                                     | NR             | 2/5                                |
| Akita et al, 2021          | Prospective cohort          | 60          | 7%               | 93%                | 100%            | 0%              | ICG LDB stage 2- 5                  | >6                  | VLNT/sLVA           | lateral thoracic/submental                             | NA             | 3/5                                |
| Brahma et al, 2021         | Retrospective cohort        | 70          | 0%               | 100%               | 0%              | 100%            | ISL stage I-II                      | NR                  | sLVA                | NA                                                     | 7,4            | 4/5                                |
| Cha et al, 2021            | Retrospective case serie    | 42          | 12%              | 88%                | 100%            | 0%              | ICG LDB stage 3- 5                  | 105,6               | sLVA                | NA                                                     | 18,3           | 4/4                                |
| Chung et al, 2021          | Retrospective case serie    | 12          | 0%               | 100%               | 100%            | 0%              | ISL stage II-III                    | 61,2                | VLNT/sLVA           | supraclavicular                                        | 12,9           | 4/4                                |
| Dionysiou et al, 2021      | Retrospective cohort        | 64          | 0%               | 100%               | 0%              | 100%            | ISL stage I-III                     | NR                  | VLNT                | inguinal                                               | 36,0           | 5/5                                |
| Drobot et al, 2021         | Retrospective cohort        | 70          | 31%              | 69%                | 56%             | 44%             | ISL stage (mean 2.3)                | 64,9                | sLVA                | NA                                                     | 8,0            | 4/5                                |
| Hara et al 2021            | Retrospective case serie    | 34          | 12%              | 88%                | 100%            | 0%              | ISL stage I-III                     | 90,0                | sLVA                | NA                                                     | 8,6            | 3/4                                |
| Kim et al, 2021            | Retrospective case serie    | 133         | 2%               | 100%               | 52%             | 48%             | Not specified                       | 46,4                | sLVA                | NA                                                     | 11,6           | 3/4                                |
| Kwon et al, 2021           | Retrospective case serie    | 17          | 29%              | 71%                | 100%            | 0%              | ISL stage II-III                    | NR                  | sLVA                | NA                                                     | NR             | 2/4                                |
| Onoda et al, 2021          | Retrospective cohort        | 28          | 7%               | 93%                | 75%             | 25%             | ISL stage II - III                  | NR                  | sLVA                | NA                                                     | 6,0            | 4/5                                |
| Rannikko et al, 2021       | Retrospective case serie    | 67          | 0%               | 100%               | 0%              | 100%            | Not specified                       | 42,0                | VLNT                | inguinal                                               | 70,0           | 3/4                                |
| Roka-Palkovits et al, 2021 | Retrospective cohort        | 70          | 10%              | 90%                | 57%             | 43%             | Cheng's lymphedema grade (mean 2.7) | 32,3                | VLNT                | submental                                              | 55,5           | 4/5                                |
| Schavieren et al, 2021     | Retrospective cohort        | 134         | 3%               | 95%                | 14%             | 86%             | MDACC stage I-IV                    | NR                  | VLNT                | omentum/mesenteric/inguinal/lateral thoracic/submental | 20,1           | 5/5                                |
| Sutherland et al, 2021     | Retrospective case serie    | 9           | 0%               | 100%               | 0%              | 100%            | ISL stage 0-II                      | 21,0                | sLVA                | NA                                                     | 22,0           | 3/4                                |
| Yang et al, 2021           | Retrospective cohort        | 8           | 0%               | 100%               | 100%            | 0%              | ISL stage 0-III                     | 126,0               | sLVA                | NA                                                     | 18,0           | 4/5                                |
| Yodrabum et al, 2021       | Retrospective case serie    | 118         | 2%               | 98%                | 0%              | 100%            | Campisi stage I-IV                  | 87,6                | sLVA                | NA                                                     | 8,0            | 3/4                                |
| Yoshida et al, Oct. 2021   | Retrospective cohort        | 86          | NR               | NR                 | 100%            | 0%              | ISL stage I-III                     | 94,8                | sLVA                | NA                                                     | 19,2           | 5/5                                |
| Yoshida et al, Sept. 2021  | Randomized trial            | 50          | 0%               | 100%               | 100%            | 0%              | ISL stage I-III                     | NR                  | sLVA                | NA                                                     | 6,0            | High risk                          |
| Bianchi et al, 2020        | Prospective case serie      | 26          | 0%               | 100%               | 46%             | 54%             | Not specified                       | NR                  | LVA (not specified) | NA                                                     | 9,0            | 4/4                                |
| Ciudad et al, Feb 2020     | Retrospective cohort        | 83          | 13%              | 87%                | 64%             | 36%             | ISL stage II - III                  | 42,0                | VLNT                | inguinal/supraclavicular/omentum/appendix/ileo-caecal  | 32,8           | 5/5                                |
| Ciudad et al, Apr 2020     | Retrospective case serie    | 6           | 0%               | 100%               | 0%              | 100%            | Not specified                       | 18,6                | VLNT                | omentum                                                | 12,8           | 4/4                                |
| Chang et al, 2020          | Prospective cohort          | 54          | 0%               | 100%               | 0%              | 100%            | Not specified                       | NR                  | VLNT/sLVA           | inguinal                                               | 21,5           | 5/5                                |
| Akita et al, 2020          | Retrospective cohort        | 106         | NR               | NR                 | 100%            | 0%              | Not specified                       | NR                  | sLVA                | NA                                                     | 12,0           | 5/5                                |
| Beederman et al, 2020      | Prospective case serie      | 274         | NR               | NR                 | 28%             | 72%             | ISL stage (mean 1.7)                | 80,4                | VLNT/sLVA           | supraclavicular                                        | 15,0           | 4/4                                |
| Tzou et al, 2020           | Retrospective case serie    | 51          | 31%              | 69%                | 82%             | 18%             | ISL stage I - III                   | NR                  | sLVA                | NA                                                     | 18,0           | 3/4                                |
| Mousavi et al, 2020        | Retrospective case serie    | 24          | 0%               | 100%               | 0%              | 100%            | Not specified                       | NR                  | VLNT                | omentum                                                | 12,0           | 3/4                                |
| Ngo et al, 2020            | Retrospective case serie    | 10          | 0%               | 100%               | 0%              | 100%            | ISL stage I - II                    | 33,0                | VLNT                | inguinal/supraclavicular                               | 46,0           | 4/4                                |
| Koide et al, 2020          | Retrospective case serie    | 70          | 17%              | 83%                | 100%            | 0%              | Cheng's stage (mean 1.6)            | 92,9                | VLNT                | submental                                              | 32,0           | 4/4                                |
| Kristiansen et al, 2020    | Prospective case serie      | 12          | NR               | NR                 | 100%            | 0%              | Not specified                       | 48,0                | sLVA                | NA                                                     | 12,0           | 3/4                                |
| Manrique et al, 2020       | Retrospective cohort        | 26          | 12%              | 88%                | 46%             | 54%             | ISL stage II                        | NR                  | sLVA                | omentum                                                | 8,3            | 4/5                                |
| Wolfs et al, 2020          | Retrospective case serie    | 25          | 0%               | 100%               | 0%              | 100%            | ISL stage I - II                    | 74,4                | sLVA                | NA                                                     | 14,8           | 4/4                                |
| Qiu et al, 2020            | Prospective cohort          | 100         | 6%               | 94%                | 15%             | 85%             | ISL stage I - III                   | NR                  | sLVA                | NA                                                     | 25,0           | 5/5                                |
| Yang et al, 2020           | Prospective cohort          | 100         | NR               | 80%                | 100%            | 0%              | ISL stage 0 - III                   | 57,6                | sLVA                | NA                                                     | NR             | 4/5                                |
| Yasunaga et al, 2020       | Retrospective case serie    | 19          | 0%               | 100%               | 0%              | 100%            | ISL stage I - II                    | NR                  | sLVA                | NA                                                     | 20,9           | 4/4                                |
| Yoshida et al, Jul 2020    | Prospective cohort          | 74          | NR               | NR                 | 100%            | 0%              | ISL stage I - III                   | 73,2                | sLVA                | NA                                                     | NR             | 4/5                                |
| Yoshida et al, May 2020    | Prospective cohort          | 113         | 30%              | 70%                | 100%            | 0%              | ISL stage I - III                   | 76,6                | sLVA                | NA                                                     | 20,6           | 5/5                                |
| Lin et al, 2020            | Prospective cohort          | 100         | 0%               | 100%               | 0%              | 100%            | Not specified                       | 6,6                 | VLNT                | inguinal/submental                                     | 6,0            | 4/5                                |
| Di Taranto et al, 2020     | Prospective case serie      | 10          | 0%               | 100%               | 100%            | 0%              | ISL stage II - III                  | NR                  | VLNT                | omentum                                                | 24,1           | 3/4                                |
| Scaglioni et al, 2019      | Prospective case serie      | 5           | 60%              | 40%                | 100%            | 0%              | ISL stage II - III                  | NR                  | sLVA                | NA                                                     | NR             | 3/4                                |
| Klingelhofer et al, 2019   | Retrospective case serie    | 26          | 0%               | 100%               | 81%             | 19%             | ISL stage I - III                   | 100                 | sLVA                | NA                                                     | 23,0           | 3/4                                |
| Gentileschi et al, 2019    | Prospective case serie      | 12          | 0%               | 100%               | 100%            | 0%              | ISL stage III                       | 14                  | sLVA + ELVA         | NA                                                     | 12,0           | 3/4                                |
| Dionysiou et al, 2019      | Retrospective case serie    | 41          | 0%               | 100%               | 0               | 100%            | ISL stage I - III                   | 60                  | VLNT                | inguinal                                               | 42,5           | 3/4                                |
| Phillips et al, Sep 2019   | Prospective case serie      | 37          | 0%               | 100%               | 0               | 100%            | Not specified                       | NR                  | sLVA                | NA                                                     | 6,5            | 4/4                                |
| Montag et al, 2019         | Prospective cohort          | 24          | 0%               | 100%               | 0               | 100%            | ISL stage I - III                   | 43,6                | VLNT                | inguinal                                               | 18,0           | 5/5                                |
| Phillips et al, Jul 2019   | Prospective case serie      | 29          | 0%               | 100%               | 100%            | 0%              | Not specified                       | NR                  | sLVA                | NA                                                     | 8,5            | 4/4                                |
| Maruccia et al, Jun 2019   | Retrospective cohort        | 21          | 0%               | 100%               | 0               | 100%            | ISL stage II                        | 25,3                | VLNT                | inguinal/omentum                                       | 32,0           | 5/5                                |
| Winters et al, 2019        | Retrospective case serie    | 12          | 0%               | 100%               | 0               | 100%            | Campisi stage I - 2a                | 93,6                | sLVA                | NA                                                     | 12,0           | 3/4                                |
| Visconti et al, 2019       | Prospective case serie      | 10          | 0%               | 100%               | 100%            | 0%              | ISL stage II                        | 64,7                | VLNT                | supraclavicular                                        | 12,0           | 4/4                                |
| Yasunaga et al, 2019       | Retrospective case serie    | 30          | 7%               | 93%                | 100%            | 0%              | ISL stage I - II                    | NR                  | sLVA                | NA                                                     | 12,2           | 4/4                                |
| Aljaaly et al, 2019        | Retrospective cohort        | 15          | 0%               | 100%               | 0               | 100%            | Cheng's stage II - IV               | 28,9                | VLNT                | submental                                              | 12,0           | 4/5                                |
| Aljindan et al, 2019       | Retrospective cohort        | 58          | 26%              | 74%                | 66%             | 34%             | Cheng's stage I - II                | 42,8                | sLVA                | NA                                                     | 16,5           | 5/5                                |
| Hara et al, Nov. 2019      | Retrospective case serie    | 56          | 11%              | 89%                | NR              | NR              | Not specified                       | NR                  | sLVA                | NA                                                     | 14,5           | 3/4                                |
| Hara et al, Feb. 2019      | Prospective cohort          | 109         | 6%               | 94%                | 95%             | 5%              | ISL stage I - III                   | 89,2                | sLVA                | NA                                                     | 9,1            | 4/4                                |
| Johnson et al, 2019        | Retrospective case serie    | 7           | 0%               | 100%               | 0%              | 100%            | ISL Stage II                        | NR                  | VLNT                | omentum                                                | 7,8            | 4/4                                |
| Ho et al, 2019             | Retrospective cohort        | 76          | NA               | NA                 | 61%             | 39%             | Cheng's stage II - IV               | 60,9                | VLNT                | not reported                                           | 50,1           | 5/5                                |
| Leppäpuska et al, 2019     | Retrospective cohort        | 27          | 0%               | 100%               | 0%              | 100%            | Not specified                       | NR                  | VLNT                | inguinal                                               | 9,9            | 4/5                                |
| Maruccia et al, Nov 2019   | Retrospective case serie    | 16          | 19%              | 81%                | 100%            | 0%              | ISL stage II - III                  | 27,2                | VLNT                | omentum                                                | 26,3           | 4/4                                |
| Seki et al, 2019           | Retrospective cohort        | 30          | 0%               | 100%               | 0%              | 100%            | ISL stage II                        | 28,0                | sLVA                | NA                                                     | NR             | 3/5                                |
| Hadiwattage et al, 2019    | Prospective case serie      | 8           | 100%             | 0%                 | 100%            | 0%              | ISL stage II - III                  | NA                  | sLVA                | NA                                                     | 18,2           | 3/4                                |
| Suzuki et al, 2019         | Retrospective case serie    | 36          | 8%               | 86%                | 100%            | 0%              | Not specified                       | 51,6                | sLVA                | NA                                                     | 6,0            | 2/4                                |
| Chung et al, 2019          | Retrospective case serie    | 18          | 0%               | 100%               | 56%             | 44%             | Campisi stages 2-3-4                | 48,0                | sLVA                | NA                                                     | NR             | 3/4                                |
| Khan et al, 2019           | Prospective case serie      | 27          | 0%               | 100%               | 0%              | 100%            | Not specified                       | 42                  | sLVA                | NA                                                     | 12,0           | 2/4                                |
| Pereira et al, 2018        | Retrospective case serie    | 33          | 34%              | 66%                | 79%             | 21%             | Not specified                       | 113,4               | sLVA                | NA                                                     | 19,2           | 4/4                                |
| Salgarello et al, 2018     | Retrospective case serie    | 70          | 7%               | 93%                | 37%             | 63%             | Not specified                       | 56                  | LVA (not specified) | NA                                                     | NR             | 2/4                                |
| Visconti et al, 2018       | Retrospective case serie    | 128         | 8%               | 92%                | 71%             | 29%             | ISL stage I - II                    | 64,7                | sLVA                | NA                                                     | NR             | 4/4                                |
| Liu et al, 2018            | Prospective case serie      | 30          | 0%               | 100%               | 0%              | 100%            | ISL stage I - II                    | 72                  | VLNT                | inguinal                                               | 22,1           | 4/4                                |
| Kenworthy et al, 2018      | Retrospective cohort        | 38          | 3%               | 97%                | 84%             | 16%             | Not specified                       | 38,5                | VLNT                | omentum                                                | NR             | 4/5                                |
| Agko et al, 2018           | Prospective case serie      | 12          | 0%               | 100%               | 50%             | 50%             | Not specified                       | 32                  | VLNT                | omentum                                                | 6,8            | 4/4                                |
| Hayashi et al, 2018        | Retrospective cohort        | 55          | 0%               | 100%               | 100%            | 0%              | ISL stage II                        | 70,8                | sLVA                | NA                                                     | 12,0           | 5/5                                |
| Akita et al, 2018          | Retrospective cohort        | 45          | NR               | NR                 | 100%            | 0%              | ISL stage II - III                  | NR                  | VLNT                | inguinal/supraclavicular/lateral thoracic/submental    | 6,0            | 3/5                                |
| Engel et al, 2018          | Retrospective cohort        | 72          | 0%               | 100%               | 0%              | 100%            | Cheng's stage I - IV                | 31,3                | VLNT/sLVA           | inguinal                                               | 33,3           | 5/5                                |
| Asuncion et al, 2018       | Retrospective case serie    | 15          | NR               | NR                 | NR              | NR              | Not specified                       | NR                  | VLNT                | submental                                              | 12,0           | 2/4                                |
| Seki et al, 2018           | Prospective case serie      | 10          | 0%               | 100%               | 100%            | 0%              | ISL stage II                        | 69,1                | sLVA                | NA                                                     | 7,7            | 3/4                                |
| Ho et al, 2018             | Retrospective cohort        | 43          | 0%               | 100%               | 0%              | 100%            | Not specified                       | 46,1                | VLNT                | inguinal/submental                                     | 39,8           | 5/5                                |

|                          |                             |     |     |      |      |      |                                           |       |                          |                                           |      |               |
|--------------------------|-----------------------------|-----|-----|------|------|------|-------------------------------------------|-------|--------------------------|-------------------------------------------|------|---------------|
| Gustafsson et al, 2018   | Retrospective case serie    | 35  | 0%  | 100% | 100% | 0%   | Cheng's stage II - IV                     | 52,8  | VLNT                     | submental                                 | 30,3 | 4/4           |
| Ciudad et al, Oct 2017   | Retrospective case serie    | 7   | 0%  | 100% | 43%  | 57%  | ISL stage III                             | 29,1  | VLNT                     | omentum                                   | 9,7  | 3/4           |
| Arrivé et al, 2017       | Retrospective case serie    | 15  | 0%  | 100% | 0%   | 100% | Not specified                             | 96    | VLNT                     | inguinal                                  | NA   | 4/4           |
| Akita et al, 2017        | Retrospective cohort        | 27  | 0%  | 100% | 0%   | 100% | Not specified                             | NR    | VLNT                     | inguinal                                  | 18,8 | 5/5           |
| Gentileschi et al, 2017  | Prospective case serie      | 16  | 0%  | 100% | 0%   | 100% | ISL stage II                              | 68,4  | sLVA                     | NA                                        | 12,1 | 3/4           |
| Winters et al, 2017      | Retrospective case serie    | 29  | 0%  | 100% | 0%   | 100% | Campisi stage 1b-2a                       | 108   | sLVA                     | NA                                        | 12,0 | 4/4           |
| Gennaro et al, 2017      | Retrospective case serie    | 37  | 11% | 89%  | 73%  | 27%  | ISL stage I - III                         | NR    | sLVA                     | NA                                        | NR   | 2/4           |
| Poumellec et al, 2017    | Retrospective case serie    | 31  | 0%  | 100% | 0%   | 100% | Campisi stage 1 - 4                       | NR    | sLVA                     | NA                                        | 12,7 | 4/4           |
| Smith et al, 2017        | Retrospective case serie    | 17  | 6%  | 76%  | 100% | 0%   | Not specified                             | 156   | VLNT                     | axillary                                  | 11,0 | 4/4           |
| Inbal et al, 2017        | Prospective case serie      | 11  | 0%  | 100% | 27%  | 73%  | ISL stage I - II                          | 93    | VLNT/LVA (not specified) | lateral thoracic                          | 6,7  | 4/4           |
| Gratzon et al, 2017      | Prospective case serie      | 50  | 0%  | 100% | 0%   | 100% | ISL stage I - II                          | 58,8  | VLNT                     | inguinal/lateral thoracic/supraclavicular | 12,0 | 4/4           |
| Nguyen et al, 2017       | Prospective case serie      | 42  | 5%  | 88%  | 55%  | 45%  | ICG-LDB stage 3 - 5                       | 69,6  | VLNT/sLVA                | omentum                                   | 14,0 | 4/4           |
| Cornelissen et al, 2017  | Prospective cohort          | 20  | 0%  | 100% | 0%   | 100% | ISL stage I - II                          | 72    | sLVA                     | NA                                        | 7,8  | 4/5           |
| Coriddi et al, 2017      | Retrospective case serie    | 15  | 0%  | 100% | 46%  | 54%  | Not specified                             | 117,1 | VLNT/sLVA                | omentum                                   | 9,0  | 3/4           |
| Ciudad et al, Mar 2017   | Retrospective case serie    | 10  | 0%  | 100% | 50%  | 50%  | ISL stage II-III                          | 35,2  | VLNT                     | omentum                                   | 14,7 | 4/4           |
| De Brucker et al, 2016   | Retrospective case serie    | 25  | 0%  | 100% | 0%   | 100% | ISL stage I - II                          | 47,8  | VLNT                     | inguinal                                  | 29,0 | 3/4           |
| Dionysiou et al, 2016    | Randomized controlled trial | 18  | 0%  | 100% | 0%   | 100% | ISL stage II                              | NA    | VLNT                     | inguinal                                  | 18,0 | Some concerns |
| Gennaro et al, 2016      | Retrospective case serie    | 69  | 13% | 87%  | 39%  | 61%  | ISL stage III - IV (according to authors) | 69,6  | sLVA                     | NA                                        | 12,0 | 3/4           |
| Chen et al, 2016         | Retrospective case serie    | 21  | 19% | 81%  | 38%  | 62%  | Campisi stage I - IV                      | NR    | VLNT/s- and mLVA         | inguinal/supraclavicular                  | NR   | 2/4           |
| Shih et al, 2016         | Prospective case serie      | 5   | 20% | 80%  | 40%  | 60%  | ISL stage II                              | NR    | sLVA                     | NA                                        | 9,0  | 3/4           |
| Ito et al, 2016          | Prospective case serie      | 5   | 40% | 60%  | 100% | 0%   | ISL stage I - II                          | 81,6  | sLVA                     | NA                                        | 10,0 | 3/4           |
| Masia et al, 2016        | Prospective case serie      | 106 | 0%  | 100% | 0%   | 100% | Not specified                             | NR    | VLNT/sLVA                | inguinal                                  | 18,0 | 4/4           |
| Mihara et al, 2016       | Retrospective case serie    | 84  | 18% | 82%  | 100% | 0%   | ISL stage I - III                         | NR    | sLVA                     | NA                                        | 18,3 | 3/4           |
| Patel et al, Jul, 2015   | Prospective cohort          | 25  | 7%  | 93%  | 40%  | 60%  | Custom stage                              | 60,5  | VLNT                     | inguinal/submental                        | 21,6 | 5/5           |
| Yamamoto et al, Feb 2015 | Retrospective cohort        | 14  | 0%  | 100% | 100% | 0%   | ICG-LDB stage 2 - 4                       | NR    | sLVA                     | NA                                        | 6,0  | 4/5           |
| Seki et al, 2015         | Retrospective cohort        | 30  | 0%  | 100% | 100% | 0%   | ICG-LDB stage 1 - 4                       | 52,4  | sLVA                     | NA                                        | 12,0 | 5/5           |
| Yamamoto et al, Oct 2015 | Retrospective case serie    | 5   | 0%  | 100% | 100% | 0%   | ICG-LDB stage 1 - 4                       | NR    | sLVA                     | NA                                        | 6,0  | 3/4           |
| Chen et al, 2015         | Retrospective case serie    | 9   | 11% | 89%  | 33%  | 77%  | Campisi stage II - IV                     | NR    | mLVA                     | NA                                        | 7,6  | 4/4           |
| Akita et al, 2015        | Retrospective cohort        | 56  | 20% | 80%  | 100% | 0%   | Not specified                             | NR    | VLNT/sLVA                | thoracic/inguinal/supraclavicular         | 18,3 | 5/5           |
| Nguyen et al, 2015       | Retrospective case serie    | 29  | 0%  | 100% | 0%   | 100% | Not specified                             | 39,6  | VLNT                     | inguinal                                  | 11,0 | 4/4           |
| Mihara et al, 2014       | Retrospective case serie    | 95  | 7%  | 93%  | 88%  | 12%  | ISL stage 0 - III                         | NR    | sLVA                     | NA                                        | 27,3 | 4/4           |
| Chen et al, 2014         | Retrospective case serie    | 10  | 0%  | 100% | 0%   | 100% | Not specified                             | NR    | VLNT                     | inguinal                                  | NR   | 3/4           |
| Ayestary et al, 2014     | Prospective case serie      | 20  | NR  | NR   | 40%  | 60%  | Campisi staging (mean 3.3)                | 74,4  | sLVA                     | NA                                        | NR   | 3/4           |
| Granzow et al, 2014      | Prospective cohort          | 16  | 25% | 75%  | 44%  | 56%  | Not specified                             | 72,6  | VLNT/sLVA                | inguinal                                  | 29,5 | 5/5           |
| Yamamoto et al, Jan 2014 | Prospective cohort          | 12  | 0%  | 100% | 100% | 0%   | ICG-LDB stage 2-5                         | NR    | sLVA                     | NA                                        | NR   | 3/5           |
| Yamamoto et al, Jul 2014 | Prospective cohort          | 6   | 0%  | 100% | 100% | 0%   | ISL stage I                               | NR    | sLVA                     | NA                                        | 6,0  | 3/5           |
| Yamamoto et al, Jan 2014 | Prospective cohort          | 11  | NR  | NR   | 73%  | 27%  | ICG-LDB stage 2-3                         | NR    | sLVA                     | NA                                        | 6,0  | 3/5           |
| Yamamoto et al, Feb 2014 | Prospective cohort          | 8   | 0%  | 100% | 63%  | 38%  | ICG-LDB stage 2 -5                        | NR    | sLVA                     | NA                                        | 6,0  | 3/5           |
| Patel et al, Jan 2015    | Retrospective case serie    | 20  | 0%  | 100% | 35%  | 65%  | Not specified                             | 51,2  | VLNT                     | inguinal/submental                        | 27,3 | 4/4           |
| Chang et al, 2013        | Prospective cohort          | 100 | 0%  | 100% | 11%  | 89%  | Not specified                             | 45,6  | sLVA                     | NA                                        | 29,1 | 5/5           |
| Akita et al, 2013        | Prospective cohort          | 53  | NR  | NR   | 100% | 0%   | Not specified                             | NR    | sLVA                     | NA                                        | NR   | 4/5           |
| Cheng et al, 2013        | Prospective cohort          | 10  | 0%  | 100% | 0%   | 100% | ISL stage II                              | 33,2  | VLNT                     | inguinal                                  | 36,6 | 5/5           |
| Viihtanen et al, 2013    | Prospective cohort          | 14  | 0%  | 100% | 0%   | 100% | Not specified                             | 54,2  | VLNT                     | inguinal                                  | 33,5 | 5/5           |
| Boccardo et al, 2013     | Retrospective cohort        | 41  | 0%  | 100% | 100% | 0%   | ISL stage I - II                          | NR    | mLVA                     | NA                                        | 42,0 | 3/4           |
| Ayestary et al, 2013     | Prospective case serie      | 20  | NR  | NR   | 0%   | 100% | Campisi stage II - V                      | 38,4  | sLVA                     | NA                                        | NR   | 3/4           |
| Yamamoto et al, 2013     | Prospective cohort          | 14  | NR  | NR   | 100% | 0%   | ISL stage I - II                          | NR    | sLVA                     | NA                                        | 6,0  | 3/5           |
| Mihara et al, 2012       | Retrospective case serie    | 6   | 0%  | 100% | 100% | 0%   | ISL stage 0 - I                           | 10    | sLVA                     | NA                                        | 6,0  | 3/4           |
| Auba et al, 2012         | Retrospective cohort        | 10  | 0%  | 92%  | 50%  | 50%  | Campisi stage II - V                      | 137   | sLVA                     | NA                                        | NR   | 3/5           |
| Saaristo et al, 2012     | Prospective cohort          | 9   | 0%  | 100% | 0%   | 100% | Not specified                             | 43    | VLNT                     | inguinal                                  | NR   | 4/5           |
| Maegawa et al, Mar 2012  | Retrospective cohort        | 57  | 11% | 89%  | 100% | 0%   | ISL stage I - III                         | NR    | sLVA                     | NA                                        | 14,0 | 5/5           |
| Cheng et al, 2012        | Prospective case serie      | 6   | 0%  | 100% | 100% | 0%   | ISL stage II - III                        | 71    | VLNT                     | submental                                 | 8,7  | 3/4           |
| Maegawa et al, May 2012  | Retrospective cohort        | 31  | 0%  | 100% | 100% | 0%   | ISL stage I - III                         | NR    | sLVA                     | NA                                        | 17,0 | 5/5           |
| Lee et al, 2011          | Prospective cohort          | 32  | 31% | 69%  | 90%  | 10%  | Custom stage                              | NR    | VLNT/s- and mLVA         | posterior axillary                        | 48,0 | 5/5           |
| Furukawa et al, 2011     | Prospective case serie      | 9   | 0%  | 100% | 0%   | 100% | Not specified                             | 87,6  | mLVA                     | NA                                        | 17,0 | 3/4           |
| Mihara et al, 2011       | Prospective case serie      | 11  | 18% | 82%  | 100% | 0%   | ISL stage I - II                          | 24,2  | LVA (not specified)      | NA                                        | 23,6 | 3/4           |
| Gharb et al, 2011        | Prospective cohort          | 21  | 0%  | 100% | 0%   | 100% | ISL stage II                              | NR    | VLNT                     | inguinal                                  | 43,0 | 5/5           |
| Chang et al, 2010        | Prospective case serie      | 20  | 0%  | 100% | 0%   | 100% | Campisi stage II - III                    | 57,6  | sLVA                     | NA                                        | 12,0 | 3/4           |
| Narushima et al, 2010    | Prospective cohort          | 14  | 0%  | 100% | 86%  | 14%  | Campisi stage II - IV                     | 86,4  | sLVA                     | NA                                        | 8,9  | 4/5           |
| Demirtas et al, 2010     | Prospective cohort          | 78  | 77% | 23%  | 100% | 0%   | Campisi stage (mean 2.8)                  | 86,9  | s- and mLVA              | NA                                        | NR   | 4/5           |
| Demirtas et al, 2009     | Prospective cohort          | 42  | 81% | 19%  | 100% | 0%   | Campisi stage II - IV                     | 93,6  | s- and mLVA              | NA                                        | 11,8 | 5/5           |
| Damstra et al, 2009      | Prospective case serie      | 10  | 0%  | 100% | 0%   | 100% | Campisi stage III                         | 63,6  | sLVA                     | NA                                        | NR   | 3/4           |
| Lin et al, 2009          | Prospective case serie      | 13  | 0%  | 100% | 0%   | 100% | Not specified                             | 32,2  | VLNT                     | inguinal                                  | 56,3 | 3/4           |
| Becker et al, 2006       | Retrospective case serie    | 24  | 0%  | 100% | 0%   | 100% | Custom stage                              | 51,7  | VLNT                     | inguinal                                  | 99,6 | 3/4           |
| Matsubara et al, 2006    | Retrospective case serie    | 9   | 0%  | 100% | 100% | 0%   | ISL stage II                              | 136,8 | sLVA                     | NA                                        | 68,0 | 3/4           |
| Koshima et al, 2004      | Retrospective case serie    | 52  | NR  | NR   | 100% | 0%   | Campisi stage III - IV                    | 63,6  | sLVA                     | NA                                        | 14,5 | 3/4           |
| Koshima et al, 2003      | Prospective cohort          | 13  | 24% | 76%  | 100% | 0%   | Not specified                             | 80,4  | sLVA                     | NA                                        | 55,2 | 5/5           |
| Yamamoto et al, 2003     | Retrospective case serie    | 18  | 0%  | 100% | 0%   | 100% | Custom stage                              | 85,2  | mLVA                     | NA                                        | 24,0 | 3/4           |
| Koshima et al, 2000      | Retrospective cohort        | 12  | 4%  | 92%  | 0%   | 100% | Custom stage                              | 98,4  | sLVA                     | NA                                        | 26,4 | 5/5           |
| Koshima et al, 1996      | Prospective case serie      | 14  | 14% | 86%  | 57%  | 43%  | Not specified                             | 95,8  | LVA (not specified)      | NA                                        | 24,3 | 3/4           |
| Campisi et al, 1995      | Retrospective case serie    | 664 | 18% | 81%  | 90%  | 10%  | Not specified                             | NR    | sLVA                     | NA                                        | 60,0 | 2/4           |
| O'Brien et al, 1990      | Retrospective case serie    | 52  | 0%  | 100% | 12%  | 88%  | Not specified                             | NR    | sLVA                     | NA                                        | 42,6 | 5/5           |
