# Supplementary material for: Outcomes after microsurgical treatment of lymphedema: a systematic review and meta-analysis
Source: PubMed Central journal article supplement (PMC10389392; doi:10.1097/js9.0000000000000210), 2023-04-17
Supplement: js9-109-1360-s005.pdf [file js9-109-1360-s005.pdf]

## Search strategies

### Medline All

---

(exp Breast Cancer Lymphedema/ OR exp Non-Filarial Lymphedema/ OR Lymphedema/ OR (lymphedema OR lymphoedema).ab,ti,kf.) AND (Microsurgery/ OR Anastomosis, Surgical/ OR Lymph Nodes/tr OR Lymphatic Vessels/su OR (microsurger\* OR micro-surger\* OR (surger\* ADJ3 (microvascular OR microscale OR microscopic)) OR bypass\* OR micro#anastomos\* OR anastomos\* OR (lymph\* ADJ3 (transfer\* OR graft\*))).ab,ti,kf.) NOT (exp animals/ NOT humans.sh.)

|             |                         |                        |
|-------------|-------------------------|------------------------|
| <b>1265</b> | <b>References found</b> | <b>31 janvier 2022</b> |
|-------------|-------------------------|------------------------|

### Embase.com

---

('lymphedema'/exp OR lymph\*dema:ab,ti,kw) AND ('microsurgery'/de OR 'microvascular surgery'/exp OR 'anastomosis'/de OR 'bypass'/de OR 'end to end anastomosis'/de OR 'end to side anastomosis'/exp OR 'side to side anastomosis'/exp OR (microsurger\* OR micro-surger\* OR (surger\* NEAR/3 (microvascular OR microscale OR microscopic)) OR bypass\* OR micro\$anastomos\* OR anastomos\* OR (lymph\* NEAR/3 (transfer\* OR graft\*)):ab,ti,kw) NOT ('animal'/exp NOT 'human'/exp)

|             |                               |                        |
|-------------|-------------------------------|------------------------|
| <b>1536</b> | <b>références trouvées le</b> | <b>31 janvier 2022</b> |
|-------------|-------------------------------|------------------------|

### PubMed

---

(lymphedema[tiab] OR lymphoedema[tiab]) AND (((microvascular[tiab] OR microscale[tiab] OR microscopic[tiab]) AND surger\*[tiab]) OR microsurger\*[tiab] OR micro-surger\*[tiab] OR anastomos\*[tiab] OR microanastomos\*[tiab] OR micro-anastomos\*[tiab] OR bypass\*[tiab] OR (lymph\*[tiab] AND (transfer\*[tiab] OR graft\*[tiab]))) NOT medline[sb])

|            |                               |                        |
|------------|-------------------------------|------------------------|
| <b>232</b> | <b>références trouvées le</b> | <b>31 janvier 2022</b> |
|------------|-------------------------------|------------------------|

### CINAHL with Full Text EBSCO

---

(MH "Lymphedema" OR TI(lymph\*dema) OR AB(lymph\*dema)) AND (MH "Anastomosis, Surgical" OR MH "Microsurgery" OR MH "Lymph Nodes/TR" OR TI(microsurger\* OR micro-surger\* OR (surger\* N3 (microvascular OR microscale OR microscopic)) OR bypass\* OR micro#anastomos\* OR anastomos\* OR (lymph\* N3 (transfer\* OR graft\*))) OR AB(microsurger\* OR micro-surger\* OR (surger\* N3 (microvascular OR microscale OR microscopic)) OR bypass\* OR micro#anastomos\* OR anastomos\* OR (lymph\* N3 (transfer\* OR graft\*)))

|           |                               |                         |
|-----------|-------------------------------|-------------------------|
| <b>97</b> | <b>références trouvées le</b> | <b>1er février 2022</b> |
|-----------|-------------------------------|-------------------------|

## Cochrane Central Register of Controlled Trials – Wiley

---

lymph\*dema:ab,ti,kw AND (microsurger\* OR micro-surger\* OR (surger\* NEAR/3 (microvascular OR microscale OR microscopic)) OR bypass\* OR micro?anastomos\* OR anastomos\* OR (lymph\* NEAR/3 (transfer\* OR graft\*))) :ab,ti,kw

|           |                               |                         |
|-----------|-------------------------------|-------------------------|
| <b>55</b> | <b>références trouvées le</b> | <b>1er février 2022</b> |
|-----------|-------------------------------|-------------------------|

## ProQuest Dissertations & Theses A&I

---

TI,AB((lymph\*dema) AND (microsurger\* OR micro-surger\* OR (surger\* NEAR/3 (microvascular OR microscale OR microscopic)) OR bypass\* OR micro?anastomos\* OR anastomos\* OR (lymph\* NEAR/3 (transfer\* OR graft\*))))

|          |                               |                         |
|----------|-------------------------------|-------------------------|
| <b>3</b> | <b>références trouvées le</b> | <b>1er février 2022</b> |
|----------|-------------------------------|-------------------------|
