# Supplementary material for: Outcomes after microsurgical treatment of lymphedema: a systematic review and meta-analysis
Source: PubMed Central journal article supplement (PMC10389392; doi:10.1097/js9.0000000000000210), 2023-04-17
Supplement: js9-109-1360-s006.pdf [file js9-109-1360-s006.pdf]

|                                                                                                               |  |
|---------------------------------------------------------------------------------------------------------------|--|
| Review title or ID                                                                                            |  |
| Study ID ( <i>surname of first author and year first full report of study was published e.g. Smith 2001</i> ) |  |
| PMID                                                                                                          |  |
| Associated PMID (errata, comments or retractions)                                                             |  |
| Notes                                                                                                         |  |

## General Information

|                                                                |  |
|----------------------------------------------------------------|--|
| Date form completed ( <i>dd/mm/yyyy</i> )                      |  |
| Name/ID of person extracting data                              |  |
| Reference citation                                             |  |
| Study author contact details                                   |  |
| Publication type ( <i>e.g. full report, abstract, letter</i> ) |  |
| Notes:                                                         |  |

## Study eligibility

| Study Characteristics | Eligibility criteria                                                                                  | Eligibility criteria met? |                          |                          |
|-----------------------|-------------------------------------------------------------------------------------------------------|---------------------------|--------------------------|--------------------------|
|                       |                                                                                                       | Yes                       | No                       | Unclear                  |
| Type of study         | Randomised Controlled Trial                                                                           | <input type="checkbox"/>  | <input type="checkbox"/> | <input type="checkbox"/> |
|                       | Prospective or retrospective cohort                                                                   | <input type="checkbox"/>  | <input type="checkbox"/> | <input type="checkbox"/> |
|                       | Prospective or retrospective case-serie (with or without controls)                                    | <input type="checkbox"/>  | <input type="checkbox"/> | <input type="checkbox"/> |
|                       | Other design requiring closer assessment :                                                            | <input type="checkbox"/>  | <input type="checkbox"/> | <input type="checkbox"/> |
| Participants          | Adults > 18 y.o. with primary or secondary lymphedema (not parasitic) with documented characteristics | <input type="checkbox"/>  | <input type="checkbox"/> | <input type="checkbox"/> |
| Types of intervention | LVA or VLNT (including combination with flap reconstruction)                                          | <input type="checkbox"/>  | <input type="checkbox"/> | <input type="checkbox"/> |
| Types of comparison   | Any                                                                                                   | <input type="checkbox"/>  | <input type="checkbox"/> | <input type="checkbox"/> |
| Outcomes:             | Volume                                                                                                | <input type="checkbox"/>  | <input type="checkbox"/> | <input type="checkbox"/> |

|  |                                                                             |                          |                          |                          |
|--|-----------------------------------------------------------------------------|--------------------------|--------------------------|--------------------------|
|  | Circumference                                                               | <input type="checkbox"/> | <input type="checkbox"/> | <input type="checkbox"/> |
|  | Number of compressive decongestive therapy (CDT) per defined period of time | <input type="checkbox"/> | <input type="checkbox"/> | <input type="checkbox"/> |
|  | Use of compressive garments                                                 | <input type="checkbox"/> | <input type="checkbox"/> | <input type="checkbox"/> |
|  | Number of infectious episodes per defined period of time                    | <input type="checkbox"/> | <input type="checkbox"/> | <input type="checkbox"/> |
|  | Lymphoscintigraphy                                                          | <input type="checkbox"/> | <input type="checkbox"/> | <input type="checkbox"/> |
|  | Lymphography                                                                | <input type="checkbox"/> | <input type="checkbox"/> | <input type="checkbox"/> |
|  | MRI/CT/SPECT-CT                                                             | <input type="checkbox"/> | <input type="checkbox"/> | <input type="checkbox"/> |
|  | Quality of life (QoL)                                                       | <input type="checkbox"/> | <input type="checkbox"/> | <input type="checkbox"/> |
|  | Patient satisfaction                                                        | <input type="checkbox"/> | <input type="checkbox"/> | <input type="checkbox"/> |

INCLUDE

Reason for exclusion

**DO NOT PROCEED IF STUDY EXCLUDED FROM REVIEW**

## Characteristics of included studies

### Methods

|            | Descriptions as stated in report/paper |
|------------|----------------------------------------|
| Design     |                                        |
| Start date |                                        |
| End date   |                                        |

### Participants

|                                | Description<br><i>Include comparative information for each intervention or comparison group if available</i> | Location in text or source (pg & ¶/fig/table/other) |
|--------------------------------|--------------------------------------------------------------------------------------------------------------|-----------------------------------------------------|
| Population description         |                                                                                                              |                                                     |
| Inclusion criteria             |                                                                                                              |                                                     |
| Exclusion criteria             |                                                                                                              |                                                     |
| Total no. of patients included |                                                                                                              |                                                     |

|                                          |  |  |
|------------------------------------------|--|--|
| Withdrawals and exclusions               |  |  |
| Age + SD                                 |  |  |
| Sex                                      |  |  |
| BMI + SD                                 |  |  |
| Etiology of lymphedema                   |  |  |
| Location of lymphedema                   |  |  |
| Preop. conservative therapy (Y/N)        |  |  |
| Stages of lymphedema (prefer ISL)        |  |  |
| Duration of lymphedema (since diagnosis) |  |  |

## Intervention

|                                        | Description as stated in report/paper |
|----------------------------------------|---------------------------------------|
| Type of intervention                   |                                       |
| Co-interventions                       |                                       |
| Number of anastomosis performed if LVA |                                       |

## Outcomes

**NB: Duplicate table if several outcomes reported**

|                                   | Description as stated in report/paper |
|-----------------------------------|---------------------------------------|
| Outcome :                         |                                       |
| Unit and technique of measurement |                                       |

## Risk of Bias assessment

Refer to NOS form and Cochrane risk of bias form

## Data and analysis.

|                                                                                         |                                       |                                 |                          |                            |                                 |                  |
|-----------------------------------------------------------------------------------------|---------------------------------------|---------------------------------|--------------------------|----------------------------|---------------------------------|------------------|
|                                                                                         | Description as stated in report/paper |                                 |                          |                            |                                 |                  |
| Outcome                                                                                 |                                       |                                 |                          |                            |                                 |                  |
| Time point/follow-up                                                                    |                                       |                                 |                          |                            |                                 |                  |
| Results                                                                                 | Intervention                          |                                 |                          | Comparison (if applicable) |                                 |                  |
|                                                                                         | Mean                                  | SD (or other variance, specify) | No. participants         | Mean                       | SD (or other variance, specify) | No. participants |
|                                                                                         |                                       |                                 |                          |                            |                                 |                  |
| Any other results reported (e.g. mean difference, CI, P value)                          |                                       |                                 |                          |                            |                                 |                  |
| Statistical methods used and appropriateness of these (e.g. adjustment for correlation) |                                       |                                 |                          |                            |                                 |                  |
| Reanalysis required? (specify)                                                          | <input type="checkbox"/>              | <input type="checkbox"/>        | <input type="checkbox"/> |                            |                                 |                  |
|                                                                                         | Yes                                   | No                              | Unclear                  |                            |                                 |                  |
| Reanalysis possible?                                                                    | <input type="checkbox"/>              | <input type="checkbox"/>        | <input type="checkbox"/> |                            |                                 |                  |
|                                                                                         | Yes                                   | No                              | Unclear                  |                            |                                 |                  |
| Reanalysed results                                                                      |                                       |                                 |                          |                            |                                 |                  |

## Other information

|                                      |                                       |
|--------------------------------------|---------------------------------------|
|                                      | Description as stated in report/paper |
| Key conclusions of study authors     |                                       |
| References to other relevant studies |                                       |
| Need to contact authors?             |                                       |
